# Supplementary material
Source: publisher figshare collection journal article supplement (https://tandf.figshare.com/articles/dataset/_/10007384)
Supplement: Supplementary file 1 [file 1]

Archive with 2 entries (2 files):
- tmph_a_1679402_sm2339.pdf
- tmph_a_1679402_sm5306.docx
