# Supplementary material
Source: publisher figshare collection journal article supplement (https://tandf.figshare.com/articles/dataset/_/10007384)
Supplement: Supplementary file 1 [file 1 › tmph_a_1679402_sm2339.pdf]

# Supplemental Material

## **Electron Detachment Dynamics of the Iodide-Guanine Cluster: Does Ionization Occur from the Iodide or from Guanine?**

Rosaria Cercola,<sup>1</sup> Kelechi O. Uleanya,<sup>1</sup> and Caroline E. H. Dessent<sup>1\*</sup>

<sup>1</sup> Department of Chemistry, University of York, Heslington, York, YO10 5DD, UK.

S1 Lowest Energy I·G clusters

S2 Collision Induced Dissociation

## **S1 Lowest Energy I·G clusters**

The structures of I·G clusters were studied via DFT, at the B3LYP/6-311++G(2d,2p) level of theory on C, N, O, and H, and 6-311G(d,p) on I with the iodine core electrons being described using the Stuttgart/Dresden (SDD) electron core pseudopotential. 3H, 7H and 9H guanine isomers (with H on G3, G7 or G9) were investigated in their keto and enol tautomeric forms. The enolic forms were studied in their cis and trans isomeric forms (with respect to the -NH<sub>2</sub> group), as described in ref. S1. For each of these structures, different iodine positions near the nucleobase were calculated, and the lowest energy ones are shown in Table S1.

**Table S1** Calculated structures of the I·G cluster. Calculations were performed were optimised at the B3LYP/6-311++G(2d,2p) level of theory on C, N, O, and H, and 6-311G(d,p)/SDD on I.

| Structure                                                                                           | Relative Energy <sup>a</sup><br>(kJ/mol) | Structure                                                                                           | Relative Energy <sup>a</sup><br>(kJ/mol) | Structure                                                                                          | Relative Energy <sup>a</sup><br>(kJ/mol) |
|-----------------------------------------------------------------------------------------------------|------------------------------------------|-----------------------------------------------------------------------------------------------------|------------------------------------------|----------------------------------------------------------------------------------------------------|------------------------------------------|
| 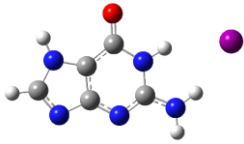<br>I·G7           | 0                                        | 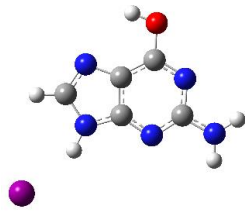<br>I·G9_E_trans   | 25.0                                     | 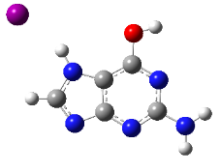<br>I·G7_E_cis  | 33.0                                     |
| 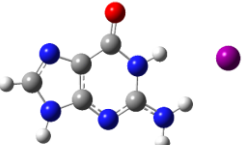<br>I·G9           | 2.43                                     | 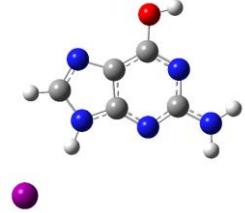<br>I·G9_E_cis    | 28.7                                     | 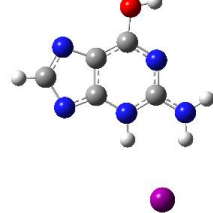<br>I·G3_E_cis | 38.0                                     |
| 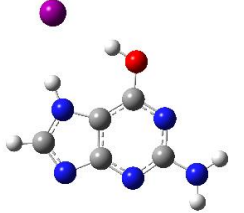<br>I·G7_E_trans | 3.45                                     | 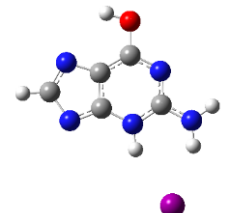<br>I·G3_E_trans | 31.7                                     | 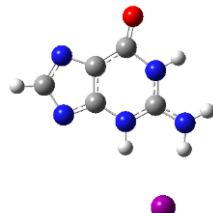<br>I·G3      | 40.7                                     |

<sup>a</sup>Relative energies are zero point corrected energies.

## S2 Collision Induced Dissociation

The fragments associated with ground-state thermal fragmentation were identified *via* collision-induced dissociation (CID) in the ion trap of the amaZon SL (Bruker, Daltoniks) [S2]. Here, selected molecular ions are trapped and accelerate to cause collisions with helium buffer gas and thus fragmentation. The acceleration is obtained by applying a voltage to the end-cap electrode, varying its amplitude between 0 and 10% (2.5 V being the maximum). CID was performed on the isolated  $\text{I}^-\cdot\text{G}$  cluster and the fragment production curves are shown in Figure S1.

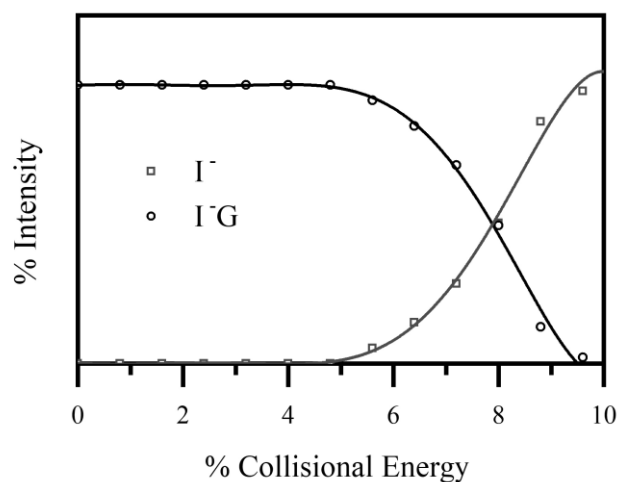

Figure S1. Fragment production curves for  $\text{I}^-\cdot\text{G}$  upon CID between 0 and 10 % energy.

## References

- [S1] G. Chunga, H. Oh and D. Lee, J. Mol. Struct. THEOCHEM **730**, 241 (2005).
- [S2] J.N. Louris, R.G. Cooks, J.E.P. Syka, P.E. Kelley, G.C. Stafford Jr. and J.F.J. Todd, Anal. Chem. **59**, 1677 (1987).
