# Supplementary material
Source: publisher figshare collection journal article supplement (https://tandf.figshare.com/articles/dataset/_/10007384)
Supplement: Supplementary file 1 [file 1 › tmph_a_1679402_sm5306.docx]

**Supplemental Material**

**Electron Detachment Dynamics of the Iodide-Guanine Cluster: Does Ionization Occur from the Iodide or from Guanine?**

Rosaria Cercola,1 Kelechi O. Uleanya,1 and Caroline E. H. Dessent1*

1 Department of Chemistry, University of York, Heslington, York, YO10 5DD, UK.

S1 Lowest Energy I-·G clusters

S2 Collision Induced Dissociation

**S1 Lowest Energy I-·G clusters**

The structures of I-·G clusters were studied via DFT, at the B3LYP/6-311++G(2d,2p) level of theory on C, N, O, and H, and 6-311G(d,p) on I with the iodine core electrons being described using the Stuttgart/Dresden (SDD) electron core pseudopotential. 3H, 7H and 9H guanine isomers (with H on G3, G7 or G9) were investigated in their keto and enol tautomeric forms. The enolic forms were studied in their cis and trans isomeric forms (with respect to the -NH2 group), as described in Ref. S1. For each of these structures, different iodine positions near the nucleobase were calculated, and the lowest energy ones are shown in Table S1

[S1] G. Chunga, H. Oh and D. Lee, J. Mol. Struct. THEOCHEM **730**, 241 (2005).

**Table S1** Calculated structures ofthe I-·G cluster. Calculations were performed were optimised at the B3LYP/6-311++G(2d,2p) level of theory on C, N, O, and H, and 6-311G(d,p)/SDD on I.

| Structure | Relative Energya  (kJ/mol) | Structure | Relative Energya  (kJ/mol) | Structure | Relative Energya  (kJ/mol) |
| --- | --- | --- | --- | --- | --- |
| 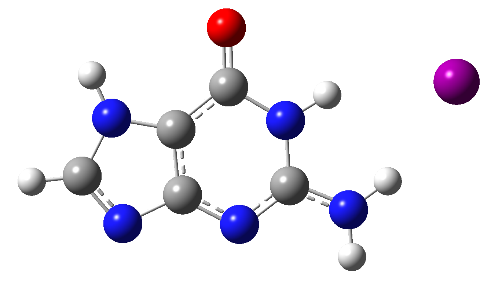  I-·G7H | 0 | 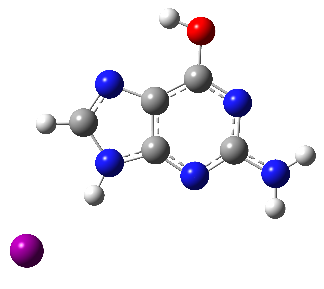  I-·G9H_E_trans | 25.0 | 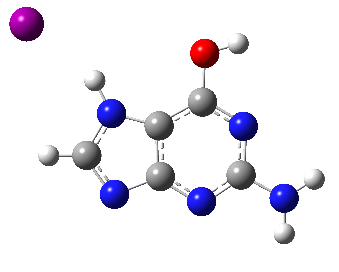  I-·G7H_E_cis | 33.0 |
| 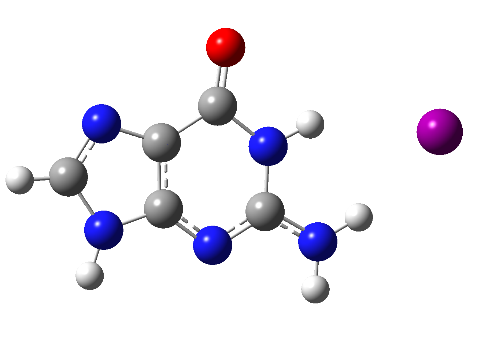  I-·G9H | 2.43 | 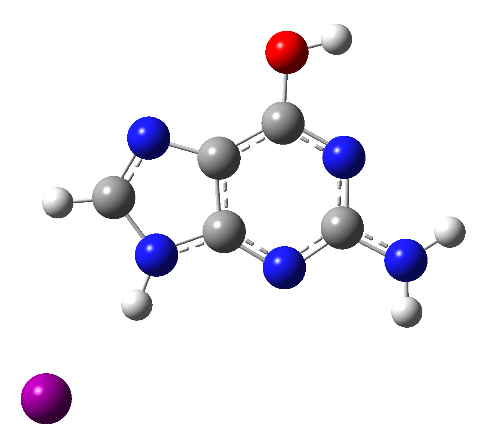  I-·G9H_E_cis | 28.7 | 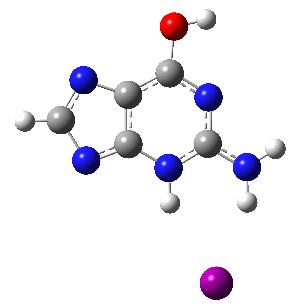  I-·G3H_E_cis | 38.0 |
| 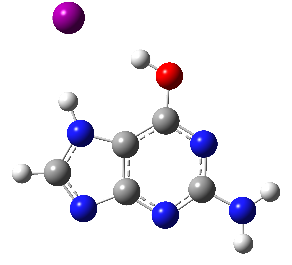  I-·G7H_E_trans | 3.45 | 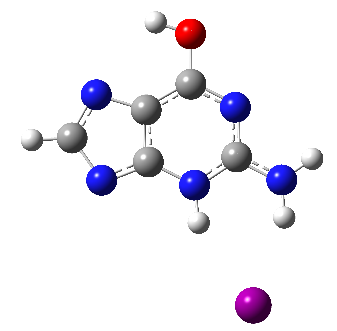  I-·G3H_E_trans | 31.7 | 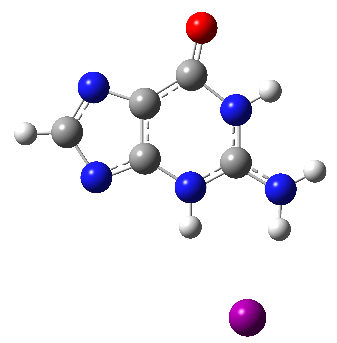  I-·G3H | 40.7 |

aRelative energies are zero point corrected energies.

**S2 Collision Induced Dissociation**

The fragments associated with ground-state thermal fragmentation were identified *via* collision-induced dissociation (CID) in the ion trap of the amaZon SL (Bruker, Daltoniks) [S2].

The clusters were generated by electrospraying a solution of guanine (1 × 10−4 mol dm-3) mixed with droplets of t-butyl ammonium iodide (1 × 10−2 mol dm-3) solution in deionized water (1 × 10−4 mol dm-3). To increase the solubility of guanine in water, the solution was made alkaline with droplets of a 30% ammonium hydroxide solution.

Selected molecular ions are trapped and accelerate to cause collisions with helium buffer gas and thus fragmentation. The acceleration is obtained by applying a voltage to the end-cap electrode, varying its amplitude between 0 and 10% (2.5 V being the maximum).

CID was performed on the isolated I-·G cluster and the fragment production curves are shown in Figure S1.





Figure S1. Fragment production curves for I-·G upon CID between 0 and 10 % energy.

[S2] E.M. Milner, M.G.D. Nix, and C.E.H. Dessent J. Phys. Chem. A **116**, 801 (2012) and refs therein.
